# Supplementary material for: IFT88 maintains sensory function by localising signalling proteins along Drosophila cilia
Source: PubMed Central journal article supplement (PMC10876440; doi:10.26508/lsa.202302289), 2024-02-19
Supplement: LSA-2023-02289_SdataF3.2.pdf [file LSA-2023-02289_SdataF3.2.pdf]

## Anti-GFP:

|               | Inputs |   | IP-GFP |   |
|---------------|--------|---|--------|---|
|               | -      | + | -      | + |
| lav::GFP (FL) | -      | + | -      | + |
| HA::DmIFT88   | +      | + | +      | + |
| GFP           | +      | - | +      | - |

|               | Inputs |   | IP-GFP |   |
|---------------|--------|---|--------|---|
|               | -      | + | -      | + |
| lav::GFP (FL) | -      | + | -      | + |
| HA::DmIFT88   | +      | + | +      | + |
| GFP           | +      | - | +      | - |

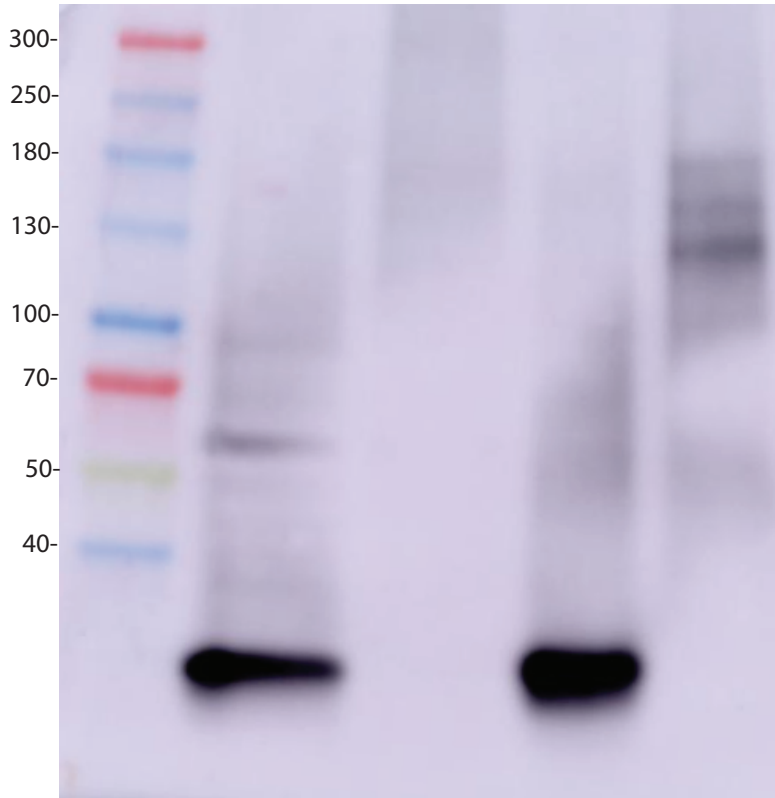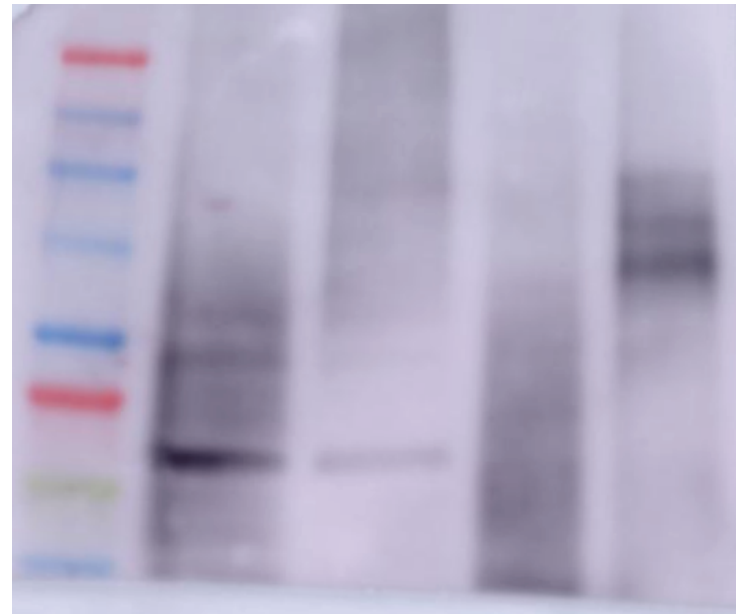

Upper portion of the left blot cut and reimaged with higher intensity, used for Fig3A middle panel (lav::GFP)

Blot used for lower Fig3A pannel (GFP) and cut afterwards and reimaged for middle pannel

## Anti-HA:

|               | Inputs |   | IP-GFP |   |
|---------------|--------|---|--------|---|
|               | -      | + | -      | + |
| lav::GFP (FL) | -      | + | -      | + |
| HA::DmIFT88   | +      | + | +      | + |
| GFP           | +      | - | +      | - |

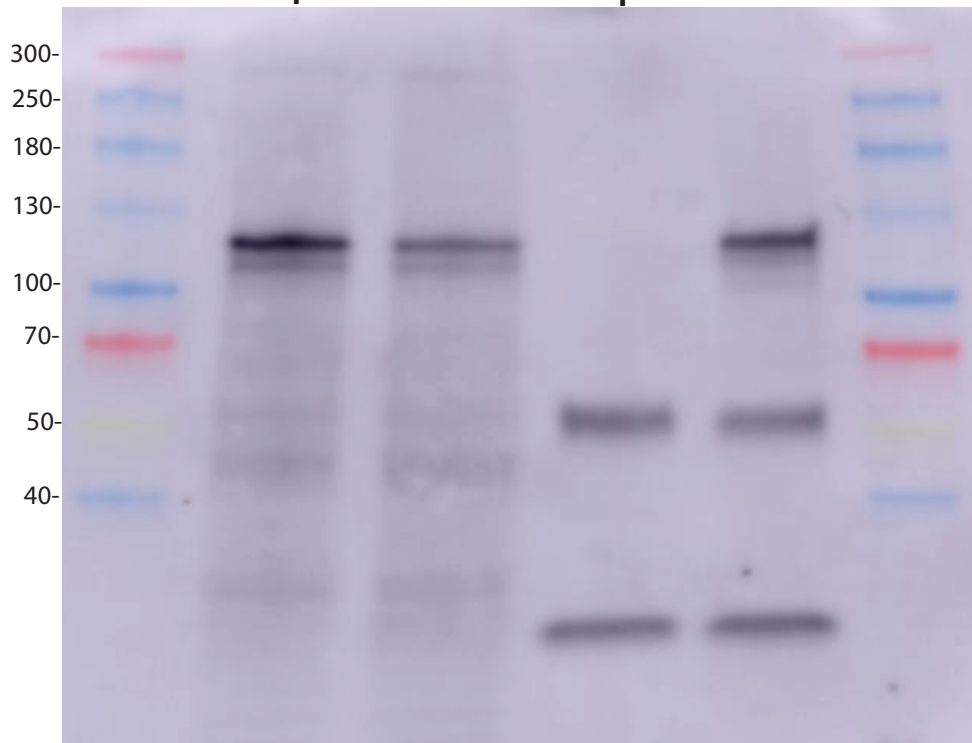

Blot used for Fig3A upper pannel (DmIFT88)
