# Supplementary material for: IFT88 maintains sensory function by localising signalling proteins along Drosophila cilia
Source: PubMed Central journal article supplement (PMC10876440; doi:10.26508/lsa.202302289), 2024-02-19

# Anti-GFP:

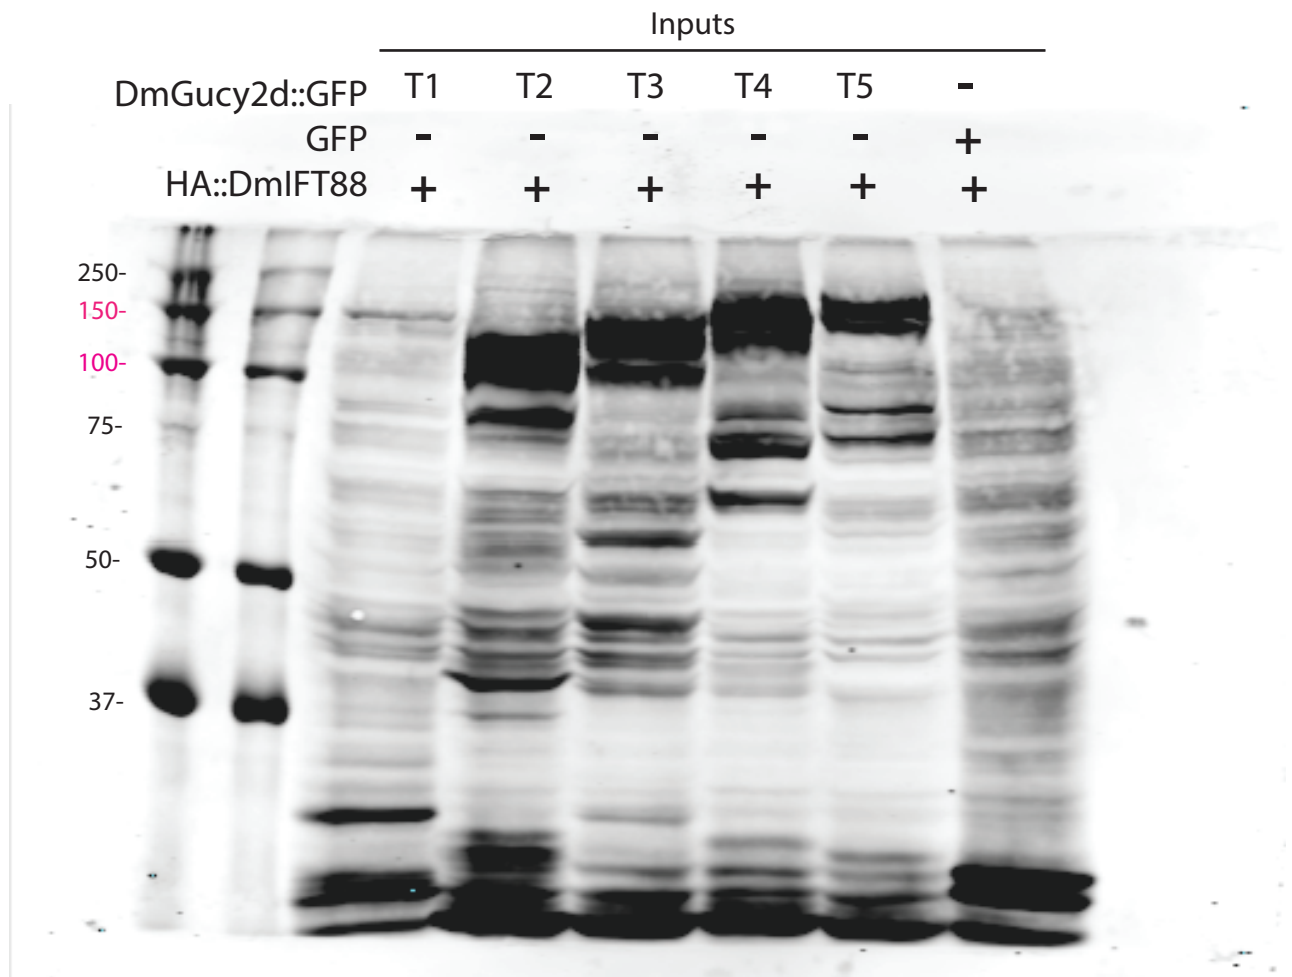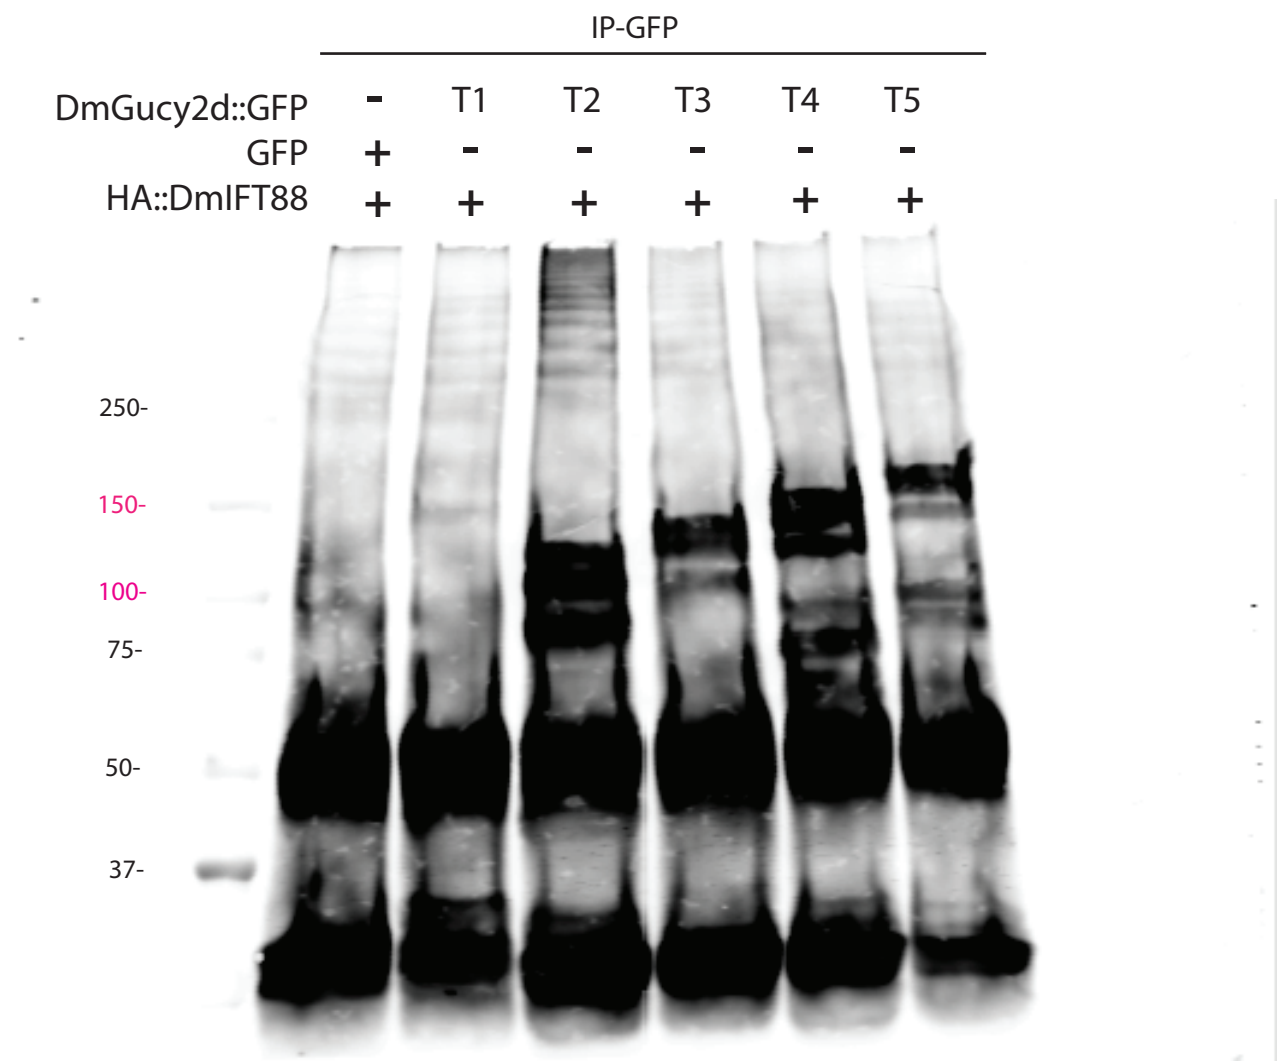

Supplement: LSA-2023-02289_SdataF4.3.pdf [file LSA-2023-02289_SdataF4.3.pdf]
