# Supplementary material for: IFT88 maintains sensory function by localising signalling proteins along Drosophila cilia
Source: PubMed Central journal article supplement (PMC10876440; doi:10.26508/lsa.202302289), 2024-02-19

# Anti-HA:

|               | Inputs |    |    |    |    |   |
|---------------|--------|----|----|----|----|---|
| DmGucy2d::GFP | T1     | T2 | T3 | T4 | T5 | - |
| GFP           | -      | -  | -  | -  | -  | + |
| HA::DmIFT88   | +      | +  | +  | +  | +  | + |

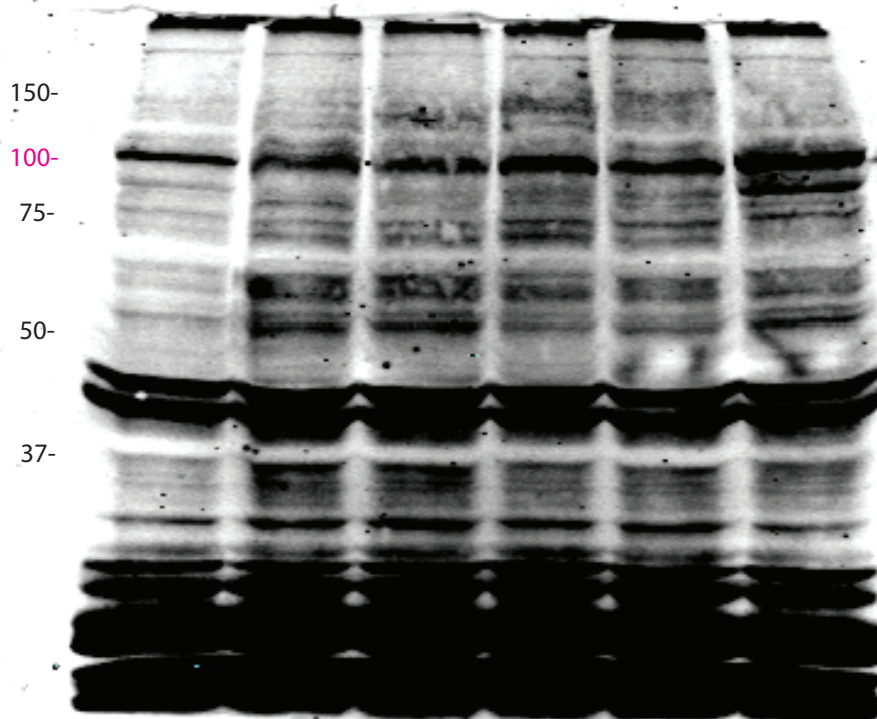

|               | IP-GFP |    |    |    |    |    |
|---------------|--------|----|----|----|----|----|
| DmGucy2d::GFP | -      | T1 | T2 | T3 | T4 | T5 |
| GFP           | +      | -  | -  | -  | -  | -  |
| HA::DmIFT88   | +      | +  | +  | +  | +  | +  |

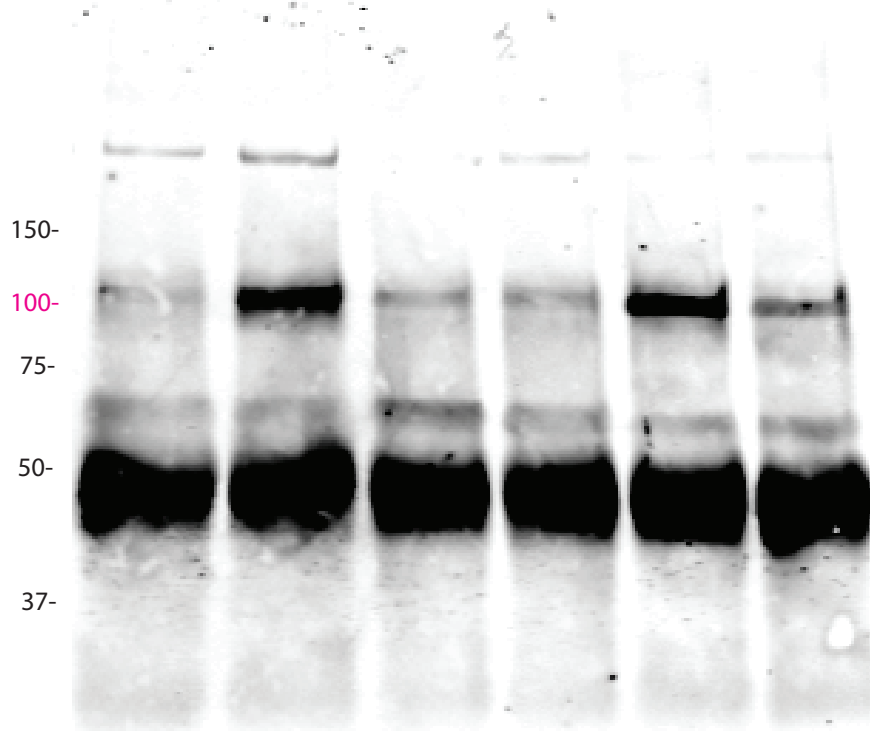

Supplement: LSA-2023-02289_SdataF4.4.pdf [file LSA-2023-02289_SdataF4.4.pdf]
